# Supplementary material for: Neutrophil extracellular traps (NETs)-mediated killing of carbapenem-resistant hypervirulent Klebsiella pneumoniae (CR-hvKP) are impaired in patients with diabetes mellitus
Source: PubMed Central journal article supplement (PMC7549946; doi:10.1080/21505594.2020.1809325), 2020-08-29

Figure S1

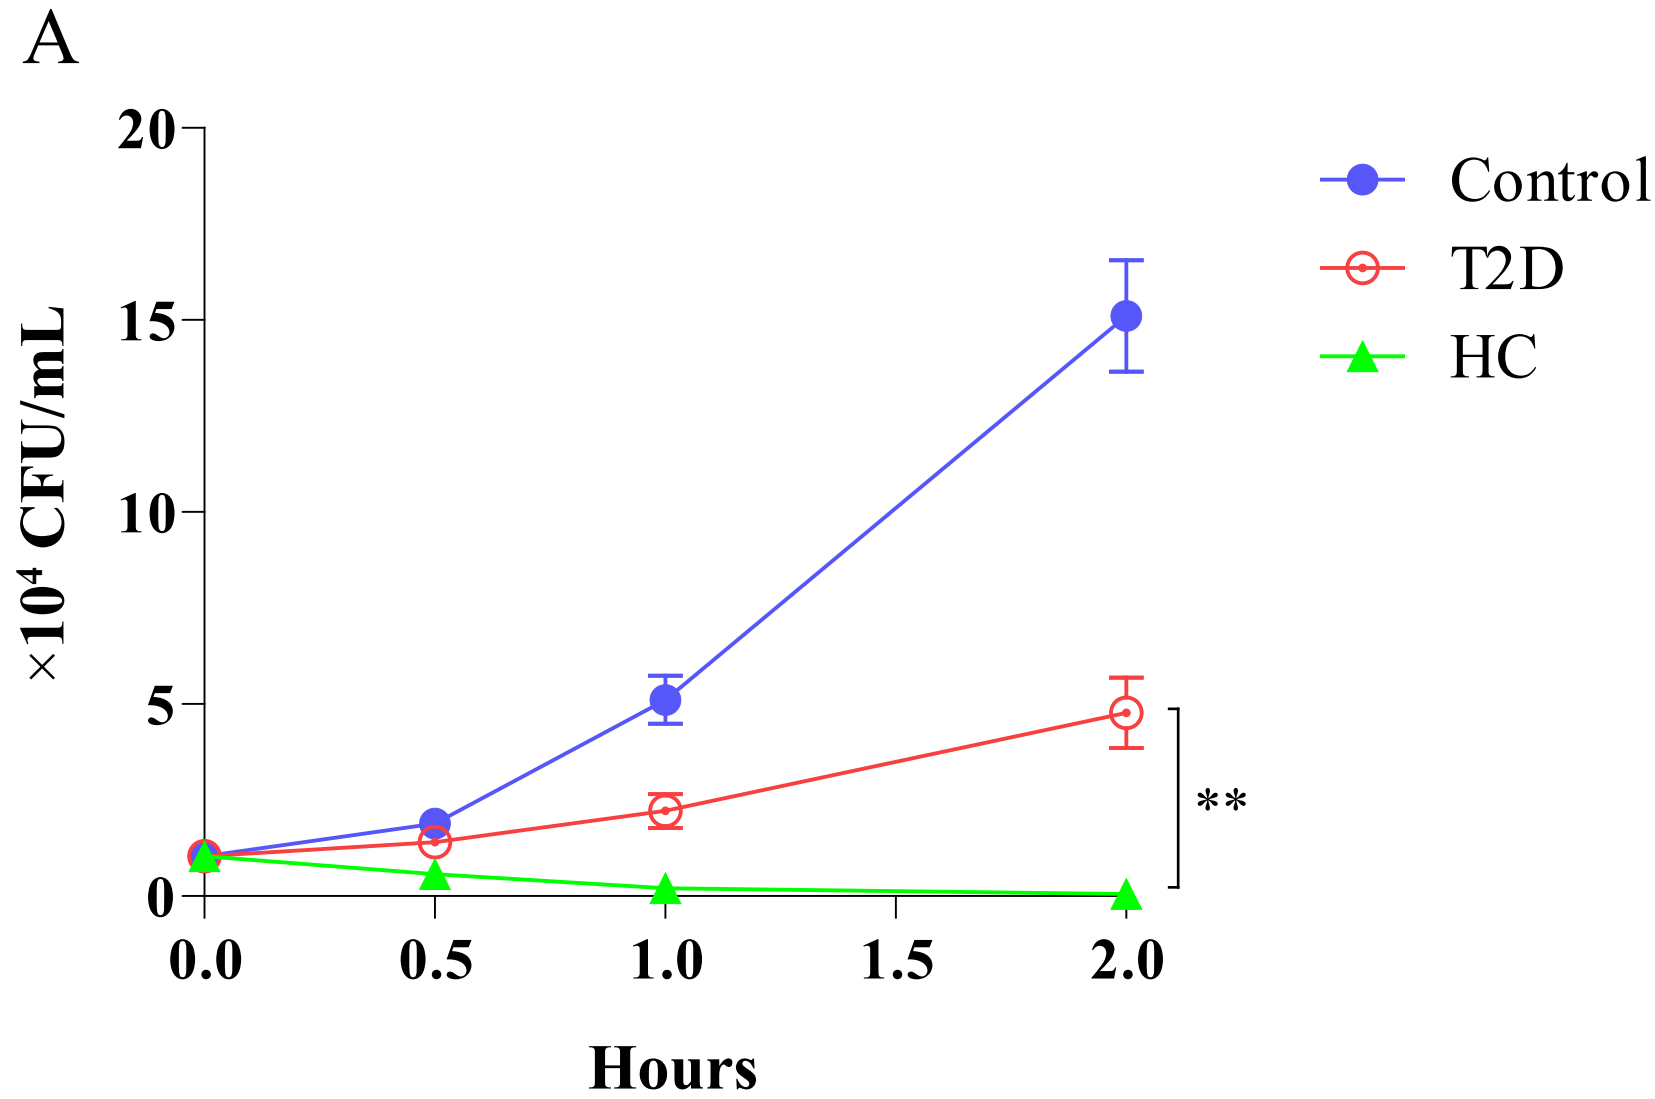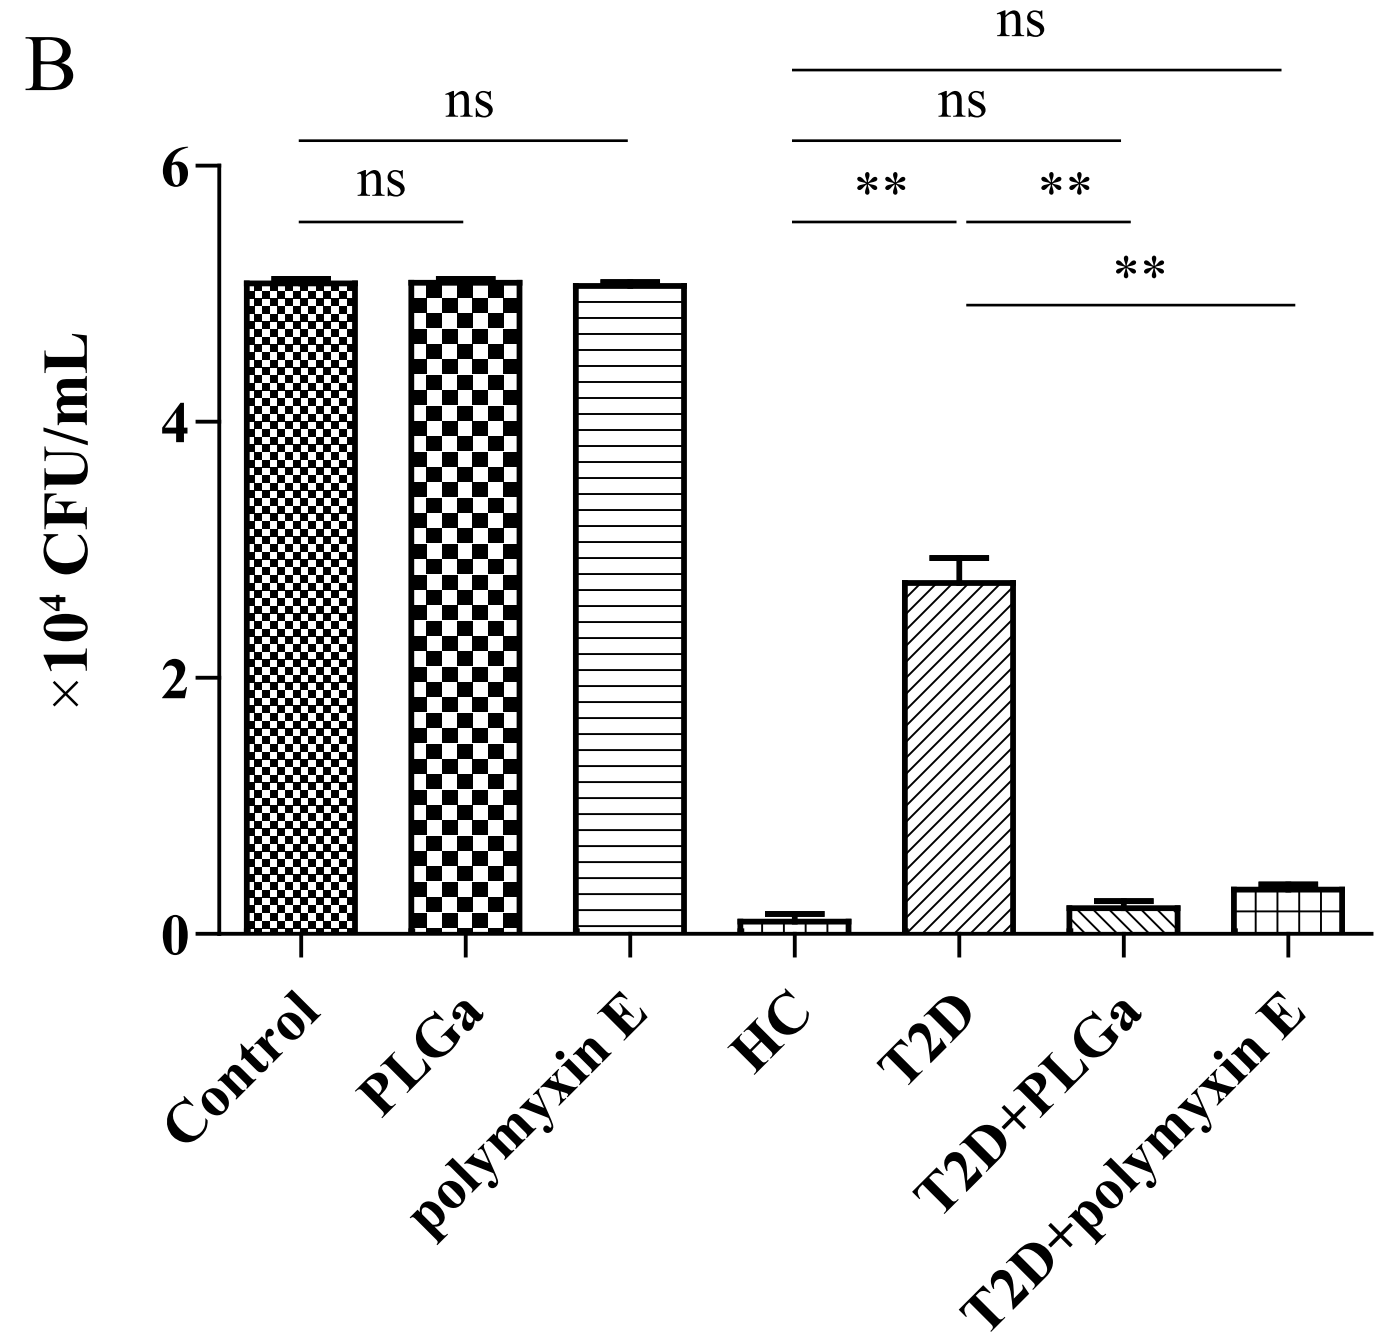

Supplement: KVIR_A_1809325_SM9711.pdf [file KVIR_A_1809325_SM9711.pdf]
